# Supplementary material for: Highly selective induction of metal-centered chirality in the ligand exchange reaction of planar-chiral cyclopentadienyl–ruthenium complex bearing an anchor phosphine ligand
Source: Royal Society of Chemistry journal article supplement (doi:10.1039/b009412i), 2001-01-01
Supplement: b009412i.doc [file b009412i.doc]

**Supplementary Material**

**Highly Selective Induction of Metal-Centered Chirality in the Ligand Exchange Reaction of Planar-Chiral Cyclopentadienyl-Ruthenium Complex Bearing an Anchor Phosphine Ligand**

Kiyotaka Onitsuka, Noriko Dodo, Yuji Matsushima, and Shigetoshi Takahashi

Crystal data for complex **1a**: C26H28F6N2O2P2Ru, MW = 677.53, orthorhombic, *Pna*21 (#33), *a* = 19.838(6), *b* = 10.375(4), *c* = 13.746(5) Å, *V* = 2829(3) Å3, *Z* = 4, **calcd = 1.590 cm–3, (Mo–K**) = 7.34 cm–1, 2max = 55º, –75 ºC, *R* (*R*w) = 0.044 (0.060) for 353 parameters against 2740 reflections with I > 3.0(I) out of 3374 total reflections, GOF = 1.14. For **2d-1**: C46H50F6NO6P3Ru, MW = 1020.89, orthorhombic, *Pna*21 (#33), *a* = 24.110(6), *b* = 13.930(3), *c* = 13.782(2) Å, *V* = 4628(3) Å3, *Z* = 4, **calcd = 1.465 cm–3, (Mo–K**) = 5.14 cm–1, 2max = 55º, –75 ºC, *R* (*R*w) = 0.058 (0.077) for 569 parameters against 3906 reflections with I > 3.0(I) out of 5535 unique reflections (*R*int = 0.018), GOF = 1.08. For **2f-1**: C48H44Cl2F6NO2P3Ru, MW = 1020.89, orthorhombic, *P*212121 (#19), *a* = 18.711(2), *b* = 22.989(2), *c* = 10.938(1) Å, *V* = 4704.9(7) Å3, *Z* = 4, **calcd = 1.476 cm–3, (Mo–K**) = 6.12 cm–1, 2max = 55º, 23 ºC, *R* (*R*w) = 0.073 (0.104) for 535 parameters against 4099 reflections with I > 3.0(I) out of 5962 total reflections, GOF = 1.10. For **2h-1**·Me2CO: C35H42F6NO3P3Ru, MW = 832.70, monoclinic, *P*21/*c* (#14), *a* = 13.143(3), *b* = 10.363(2), *c* = 27.556(1) Å, ** = 96.366(8)º, *V* = 3729.9(9) Å3, *Z* = 4, **calcd = 1.483 cm–3, (Mo–K**) = 6.14 cm–1, 2max = 55º, –75 ºC, *R* (*R*w) = 0.047 (0.063) for 442 parameters against 5602 reflections with I > 3.0(I) out of 8561 unique reflections (*R*int = 0.026), GOF = 1.12. For **2m-1**·0.5CH2Cl2: C30.5H41ClF6NO2P3Ru, MW = 797.10, monoclinic, *P*21/*c* (#14), *a* = 13.214(6), *b* = 9.903(8), *c* = 29.14(1) Å, ** = 99.48(3)º, *V* = 3760(3) Å3, *Z* = 4, **calcd = 1.408 cm–3, (Mo–K**) = 6.72 cm–1, 2max = 55º, –50 ºC, *R* (*R*w) = 0.061 (0.108) for 400 parameters against 6583 reflections with I > 3.0(I) out of 8691 unique reflections (*R*int = 0.019), GOF = 1.22. For **2n-1**: C45H46F6NO5P3Ru, MW = 988.84, monoclinic, *P*21/*c* (#14), *a* = 9.9106(9), *b* = 18.985(2), *c* = 24.077(2) Å, ** = 98.299(8)º, *V* = 4482.8(8) Å3, *Z* = 4, **calcd = 1.465 cm–3, (Mo–K**) = 5.27 cm–1, 2max = 55º, –70 ºC, *R* (*R*w) = 0.066 (0.093) for 550 parameters against 5989 reflections with I > 3.0(I) out of 10275 unique reflections (*R*int = 0.044), GOF = 1.17. For **2o-1**: C30H40F6NO5P3Ru, MW = 802.63, monoclinic, *P*21/*c* (#14), *a* = 14.150(9), *b* = 10.317(2), *c* = 23.743(1) Å, ** = 94.226(7)º, *V* = 3456.7(8) Å3, *Z* = 4, **calcd = 1.542 cm–3, (Mo–K**) = 6.63 cm–1, 2max = 55º, –75 ºC, *R* (*R*w) = 0.047 (0.080) for 415 parameters against 6050 reflections with I > 3.0(I) out of 7949 unique reflections (*R*int = 0.189), GOF = 1.29.

ORTEP  drawings of complexes **1a**, **2d-1**, **2f-1**, **2h-1**, **2m-1**, **2n-1** and **2o-1** are shown in Figures 2, 3, 4, 5, 6, 7 and 8, respectively. Hydrogen atoms and a counter anion are omitted for clarity in all drawings.
