# Supplementary material for: Highly selective induction of metal-centered chirality in the ligand exchange reaction of planar-chiral cyclopentadienyl–ruthenium complex bearing an anchor phosphine ligand
Source: Royal Society of Chemistry journal article supplement (doi:10.1039/b009412i), 2001-01-01
Supplement: b009412i2.doc [file b009412i2.doc]

Figure 3. Molecular structure of complex **2d-1**.
